# Supplementary material for: Centriole triplet microtubules are required for stable centriole formation and inheritance in human cells
Source: eLife. 2017 Sep 14;6:e29061. doi: 10.7554/eLife.29061 (PMC5653238; doi:10.7554/eLife.29061)
Supplement: Figure 1—source data 1. — Related to Figure 1E. Centriole outer diameters and centriole lumenal diameters were measured from EM images. Numbers are in nm. Control cells are RPE-1 TP53−/− and both mother centrioles and procentrioles were quantitated. [file elife-29061-fig1-data1.xlsx]

## Sheet: Centriole diameter measurements
Centriole outer diameters (nm)						Centriole lumenal diameters (nm)
Control		TUBD1-/-	TUBE1-/-			Control		TUBD1-/-	TUBE1-/-
Mother centrioles	Procentrioles					Mother centrioles	Procentrioles
219.8	217.9	186.4	169.27			116	116.3	80.3	87.115
234.4	217.7	156.5	179.887			113.3	109.6	101.3	87.694
211.9	202.7	168.9	180.359			107.1	92.4	83.6	76.051
239.9	206.7	162.4	159.506			115	96.5	87.7	75.439
215.1	202.7	167.8	163.541			113.5	94.3	77.2	77.284
232.8	219.8	151.4	170.65			114.9	122.1	83.8	87.899
198.3	214.6	156.7	174.579			117	92.1	82	85.349
215.4	195.5	185.8	176.011			126.2	96	96.2	85.164
230.3	213	169.9	180.745			109	116	94.2	87.282
220.8	230	182.4	177.66			121.2		80.9	84.527
223.4		170.2	191.745			121.4		85.7	98.789
231.5		182.9	173.326			112.9		81.2	89.977
227.9		171.2	172.357			106.3		89.3
220.1		180				115		85.6
212.1		162.3						83.5
222.1		198.7						95.8
223.8		178.3						93.2
237.4								101.7
228
217.4
221.5
220
225
221
