# Supplementary material for: Centriole triplet microtubules are required for stable centriole formation and inheritance in human cells
Source: eLife. 2017 Sep 14;6:e29061. doi: 10.7554/eLife.29061 (PMC5653238; doi:10.7554/eLife.29061)
Supplement: Figure 2—source data 1. — Related to Figure 2A. Centriole length was measured from EM images. Numbers are in nm. Highlights: blue: G2/M procentrioles, green: S-phase procentrioles, purple: mitotic TUBE1−/− centrioles. Control cells are RPE-1 TP53−/− and both mother centrioles and procentrioles were quantitated. [file elife-29061-fig2-data1.xlsx]

## Sheet: Centriole length measurements
Centriole length (nm)
Control		TUBD1-/-	TUBE1-/-
Mother centrioles	Procentrioles
461	402.889	277.381	287.53
455.4	392.541	244.705	317.209
503.2	389.968	161.795	372.204
502	194.175	221.79	283.779
523.6	196.202	192.774	198.048
464.2	390.59	186.462	307.901
525.2	235.716	240.715	230.094
548.5	201.025	224.042	299.824
461.1	441	227.345	256.612
431.8		227.01	303.902
498		241.808	292.84
538.8		319.314	211.213
490		216.607	647.9
395		216.49	533.2
		223.679	535.1
		187.574
		200.435
		184.521
Key:
G2/M procentrioles
S-phase procentrioles
Mitotic centrioles in TUBE1-/-
